# Supplementary material for: Fabrication and characterization of ReO3-type dielectric films
Source: Royal Society of Chemistry journal article supplement (doi:10.1039/d0tc00821d), 2020-01-01
Supplement: d0tc00821d1.pdf [file d0tc00821d1.pdf]

## Supporting Information

### Fabrication and characterization of $\text{ReO}_3$ -type dielectric films

Masanori Kodera,<sup>\*1</sup> Ayako Taguchi,<sup>2</sup> Takao Shimizu,<sup>3,†</sup> Hiroki Moriwake,<sup>\*2</sup> and Hiroshi Funakubo<sup>\*1,3</sup>

<sup>1</sup>Material Research Center for Element Strategy, Tokyo Institute of Technology, Yokohama, 226-8502, Japan

<sup>2</sup>Nanostructures Research Laboratory, Japan Fine Ceramics Center, Atsuta-ku, Nagoya 456-8587, Japan

<sup>3</sup>School of Materials and Chemical Technology, Tokyo Institute of Technology, Yokohama, 226-8502, Japan

\* Corresponding Authors: kodera.m.aa@m.titech.ac.jp, moriwake@jfcc.or.jp, funakubo.h.aa@m.titech.ac.jp

#### Contents:

#### Experimental Details

**Table S1.** Calculated relative energy of  $\text{TaO}_2\text{F}$  for various structure models.

**Figure S1.** Calculated crystal structures of  $\text{TaO}_2\text{F}$

**Figure S2.** A  $2\theta$ - $\psi$  mapping of XRD measurement for  $\text{NbO}_2\text{F}/\text{Nb}/\text{Al}_2\text{O}_3$

**Figure S3.** Diffuse reflectance spectra of  $\text{NbO}_2\text{F}/\text{Nb}$ ,  $\text{TaO}_2\text{F}/\text{Ta}$  thin films.

**Figure S4.** Estimated depth profile for  $\text{NbO}_2\text{F}/\text{Nb}/\text{Al}_2\text{O}_3$  by Rutherford backscattering spectrometry.

## **Materials synthesis and characterization**

TaO<sub>2</sub>F and NbO<sub>2</sub>F thin films were synthesized following a hydrothermal method.<sup>1</sup> Before the hydrothermal synthesis, Nb or Ta films were deposited on (001)-oriented Al<sub>2</sub>O<sub>3</sub> substrates (Shinko-sha) via radio frequency magnetron sputtering at room temperature. Metal films prepared on the Al<sub>2</sub>O<sub>3</sub> substrate (*M*/Al<sub>2</sub>O<sub>3</sub>, *M* = Nb, or Ta) and 2 mL of HF solution (0.1-1%) were placed in a Teflon cup. Basically, Nb/Al<sub>2</sub>O<sub>3</sub> substrates were more reactive than Ta/Al<sub>2</sub>O<sub>3</sub> in HF vapor oxidation. The substrate was held in the inner Teflon holder so as not to directly touch the solution (Also see Fig. 1 in manuscript). The Teflon cup was then placed in a steel autoclave and heated at 413 K for a certain period of time (60-150 min). After heating, the autoclave was cooled in water to room temperature. The films were then washed with distilled water and dried at 353 K for 10 min. The obtained films are denoted as *MO*<sub>2</sub>F/*M*/Al<sub>2</sub>O<sub>3</sub> (*M* = Nb, or Ta).

Samples were characterized using X-ray diffraction (XRD; D8 discover, Bruker,  $\lambda$  = 0.154 nm), UV-vis diffuse reflectance spectroscopy (DRS; JASCO, V-670DS, 200 < $\lambda$ < 600 nm), and field-emission scanning electron microscopy (FE-SEM; Hitachi, S-4800, and Hitachi, S-5500 with EDS module). The diffuse reflectance (*R*) data were converted to the Kubelka-Munk function using the equation  $f(R) = (1-R)^2/(2R)$ . The relative dielectric constants and dielectric losses were measured using an impedance analyzer (4194A, Hewlett Packard) while sweeping the oscillation frequency from 0.2 to 2000 kHz and voltage of 1.0 V. Pt top electrodes (100 nm thick) were deposited using electron beam evaporation.

## **DFT calculations**

All first principles calculations in this work were performed with the projector augmented wave (PAW) method<sup>2,3</sup> based on the density functional theory (DFT) implemented in the Vienna Ab initio Simulation Package (VASP) code.<sup>4,5</sup> Generalized gradient approximation parameterized with the Perdew–Burke–Ernzerhof (GGA-PBE) functional was used for exchange-correlation interactions. Nb 4s<sup>2</sup> 4p<sup>6</sup> 5s<sup>1</sup> 4d<sup>4</sup>, O 2s<sup>2</sup> 2p<sup>4</sup>, and F 2s<sup>2</sup> 2p<sup>5</sup> were treated as valence electrons. A plane-wave kinetic energy cutoff of 500 eV and a 3 × 3 × 3 k-point mesh for sampling the Brillouin zone were used. All calculations were performed using 3 × 3 × 3 supercells (containing 108 atoms) of the *MO*<sub>2</sub>F unit cell. Supercell volumes were held fixed as the experimental value reported by Dabachi et al.<sup>6</sup> in all cases. Structure optimizations were truncated by 0.02 eV/Å. For precise calculations, the electronic density of states (DOSs) was calculated using the HSE06 hybrid functionals.<sup>7</sup>

Table S1. Calculated relative energy of TaO<sub>2</sub>F using various structural models.

| Entry | Structure                                      | Cell size | Relative energy (meV / f.u.) |
|-------|------------------------------------------------|-----------|------------------------------|
| 1     | Uni-axial -Ta-O-Ta-O-Ta-F- chain (Fig. S1 (a)) | 3 × 3 × 3 | 0                            |
| 2     | Uni-axial -Ta-O-Ta-O-Ta-F- chain (Fig. S1 (b)) | 3 × 3 × 3 | -31.4                        |
| 3     | SQS structure (Fig. S1 (c))                    | 3 × 3 × 3 | 323.4                        |

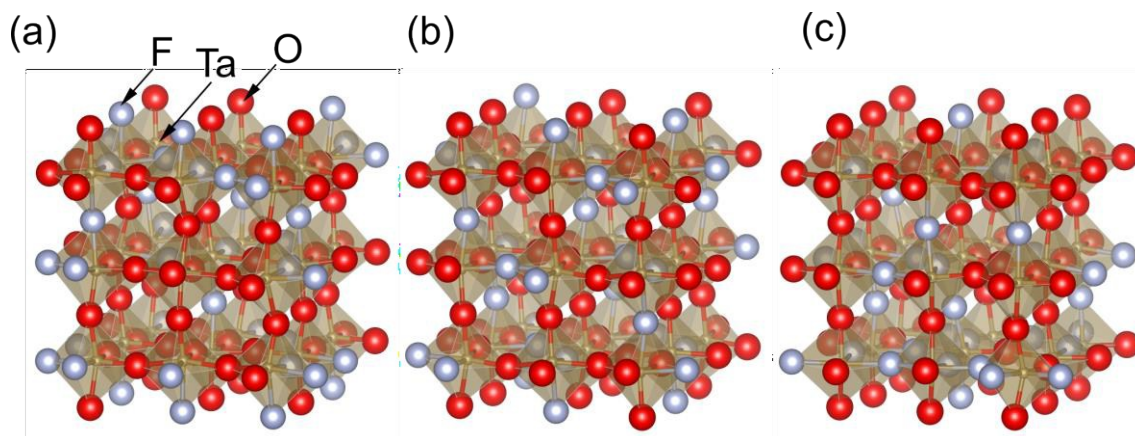

Figure S1. Calculated crystal structures of TaO<sub>2</sub>F. (a) 3 × 3 × 3 TaO<sub>2</sub>F supercell with uniaxial -Ta-O-Ta-O-Ta-F- chain proposed by Dabachi et al.<sup>6</sup> (b) 3 × 3 × 3 TaO<sub>2</sub>F supercell with uniaxial -Ta-O-Ta-O-Ta-F- chain. In this model, each unit cell contains four O atoms and two F atoms (TaO<sub>4</sub>F<sub>2</sub>). (c) SQS structure calculated with CLUPAN code.<sup>8,9</sup> VESTA was used for structural model visualization.<sup>10</sup>

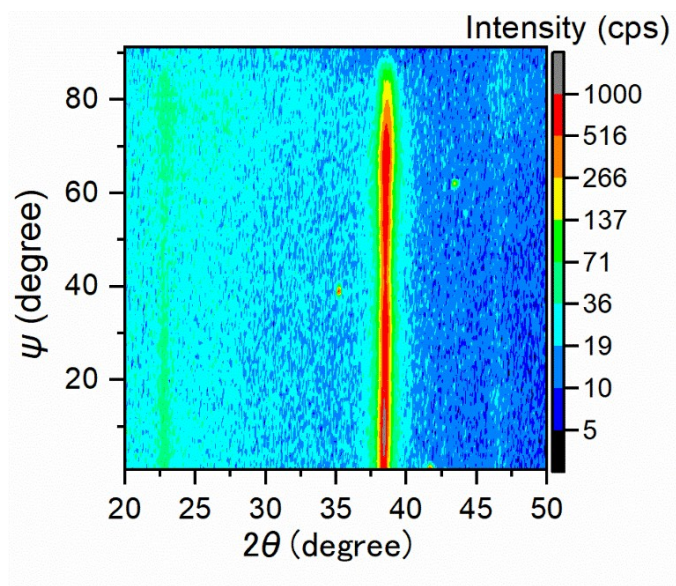

Figure S2. A  $2\theta$ - $\psi$  mapping of XRD measurements for  $\text{NbO}_2\text{F}/\text{Nb}/\text{Al}_2\text{O}_3$  hydrothermally treated at 413 K with 0.2% HF solution for 120 min.

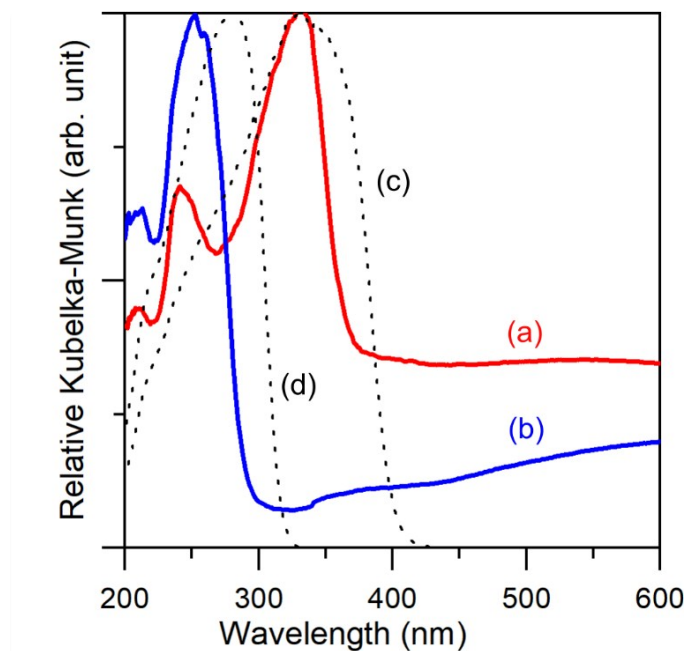

Figure S3. Diffuse reflectance spectra of (a)  $\text{NbO}_2\text{F}/\text{Nb}$ , (b)  $\text{TaO}_2\text{F}/\text{Ta}$ , (c)  $\text{Nb}_2\text{O}_5$  powder, and (d)  $\text{Ta}_2\text{O}_5$  powder.

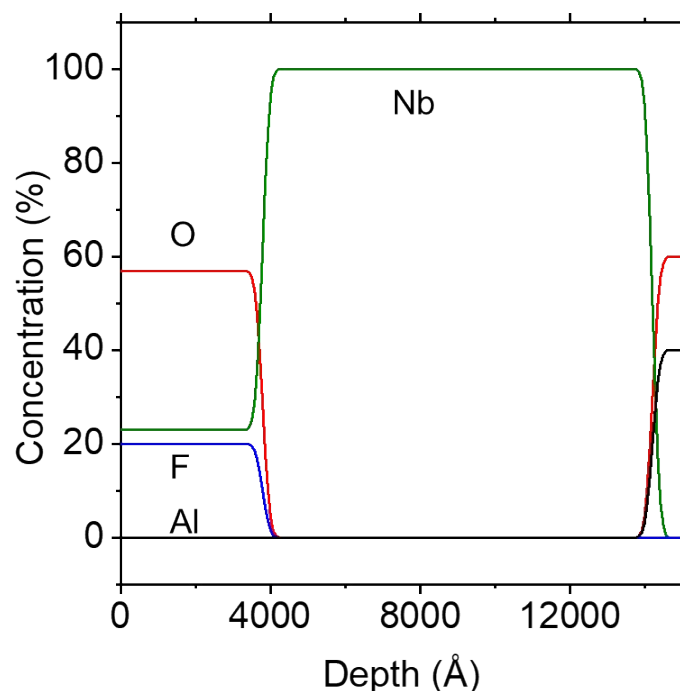

Figure S4. Estimated depth profile for NbO<sub>2</sub>F/Nb/Al<sub>2</sub>O<sub>3</sub> hydrothermally treated at 413 K with 0.2% HF solution for 120 min by Rutherford backscattering spectrometry. Composition of NbO<sub>2</sub>F thin film was estimated to be Nb<sub>1.00(1)</sub>O<sub>2.46(17)</sub>F<sub>0.87(6)</sub>.

## References

- 1 J. Yang, Q. Wu, S. He, J. Yan, J. Shi, J. Chen, M. Wu and X. Yang, *Nanoscale*, 2015, **7**, 13888–13897.
- 2 P. E. Blöchl, *Phys. Rev. B*, 1994, **50**, 17953–17979.
- 3 G. Kresse, *Phys. Rev. B - Condens. Matter Mater. Phys.*, 1999, **59**, 1758–1775.
- 4 G. Kresse and J. Furthmüller, *Comput. Mater. Sci.*, 1996, **6**, 15–50.
- 5 G. Kresse and J. Furthmüller, *Phys. Rev. B*, 1996, **54**, 11169–11186.
- 6 J. Dabachi, M. Body, C. Galven, F. Boucher and C. Legein, *Inorg. Chem.*, 2017, **56**, 5219–5232.
- 7 A. V. Krukau, O. A. Vydrov, A. F. Izmaylov and G. E. Scuseria, *J. Chem. Phys.*, 2006, **125**, 224106.
- 8 A. Seko, Y. Koyama and I. Tanaka, *Phys. Rev. B*, 2009, **80**, 165122.
- 9 A. Seko, K. Yuge, F. Oba, A. Kuwabara, I. Tanaka and T. Yamamoto, *Phys. Rev. B*, 2006, **73**, 094116.
- 10 K. Momma and F. Izumi, *J. Appl. Crystallogr.*, 2011, **44**, 1272–1276.
